# Supplementary material for: P2Y2R activation by nucleotides released from the highly metastatic breast cancer cell contributes to pre-metastatic niche formation by mediating lysyl oxidase secretion, collagen crosslinking, and monocyte recruitment
Source: PubMed Central journal article supplement (PMC4253437; doi:10.18632/oncotarget.2427), 2014-09-02
Supplement: oncotarget-05-9322-s001.pdf [file oncotarget-05-9322-s001.pdf]

**P2Y<sub>2</sub>R activation by nucleotides released from the highly metastatic breast cancer cell contributes to pre-metastatic niche formation by mediating lysyl oxidase secretion, collagen crosslinking, and monocyte recruitment**

**Supplementary Material**

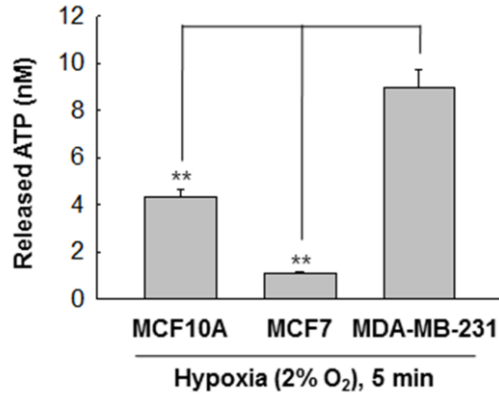

**Supplemental Fig. 1:** High metastatic breast cancer cell MDA-MB-231 releases high level of ATP compared to low metastatic breast cancer cell MCF-7 or normal epithelial breast cell MCF10A under hypoxic condition.

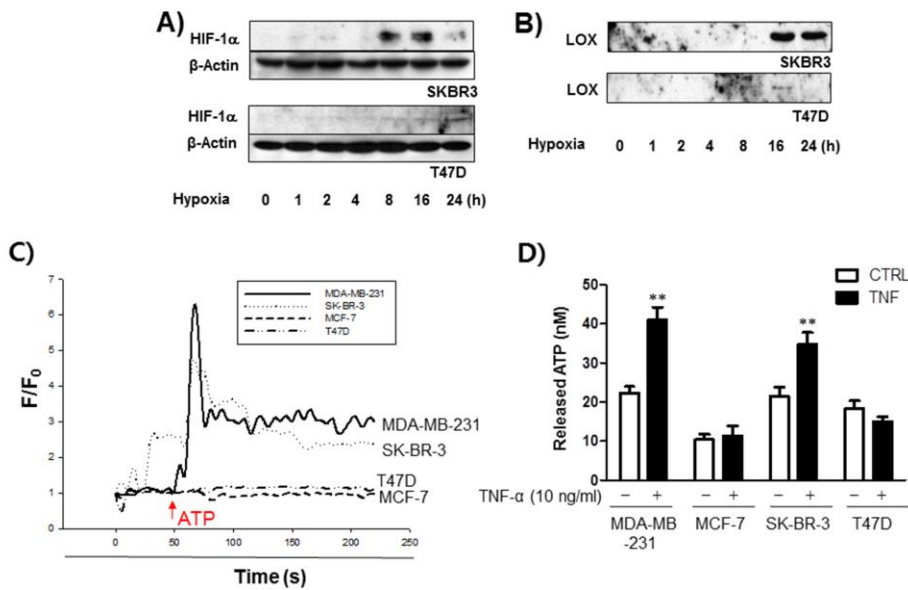

**Supplemental Fig. 2:** Highly metastatic breast cancer cell SK-BR-3 dramatically induced HIF-1 $\alpha$  expression and LOX release by hypoxia. However T47D showed low ATP level and very weak HIF-1 $\alpha$  expression and LOX release by hypoxia. In parallel, SK-BR-3 showed an elevated [Ca<sup>2+</sup>]<sub>i</sub> levels in response to ATP; however T47D did not elevate [Ca<sup>2+</sup>]<sub>i</sub> levels. Additionally, SK-BR-3 showed an increased ATP level like MDA-MB-231 but T47D did not.

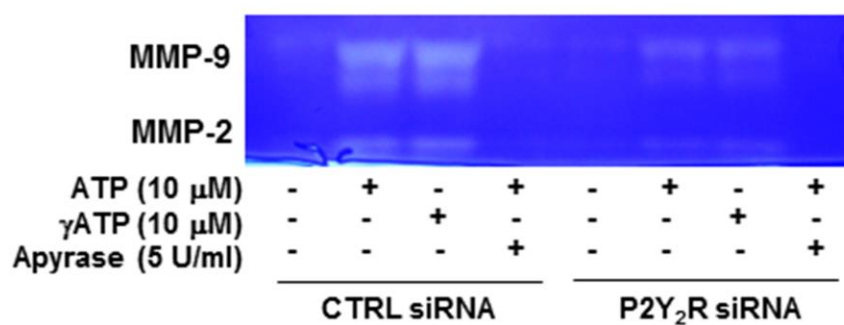

**Supplemental Figure 3.** ATP as well as  $\gamma$ ATP treatment prominently increased MMPs (especially MMP-9) activity in control siRNA-transfected THP-1 cells but not in P2Y<sub>2</sub>R siRNA-transfected THP-1 cells.
